# Supplementary material for: RESCUE: imputing dropout events in single-cell RNA-sequencing data
Source: PubMed Central journal article supplement (PMC6624880; doi:10.1186/s12859-019-2977-0), 2019-07-12

**Fig. S5****a**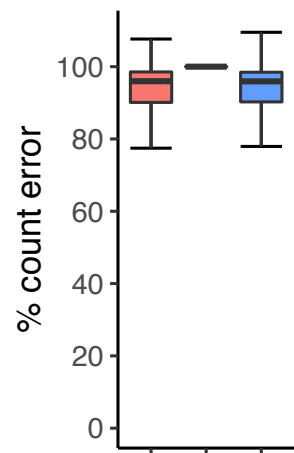**b**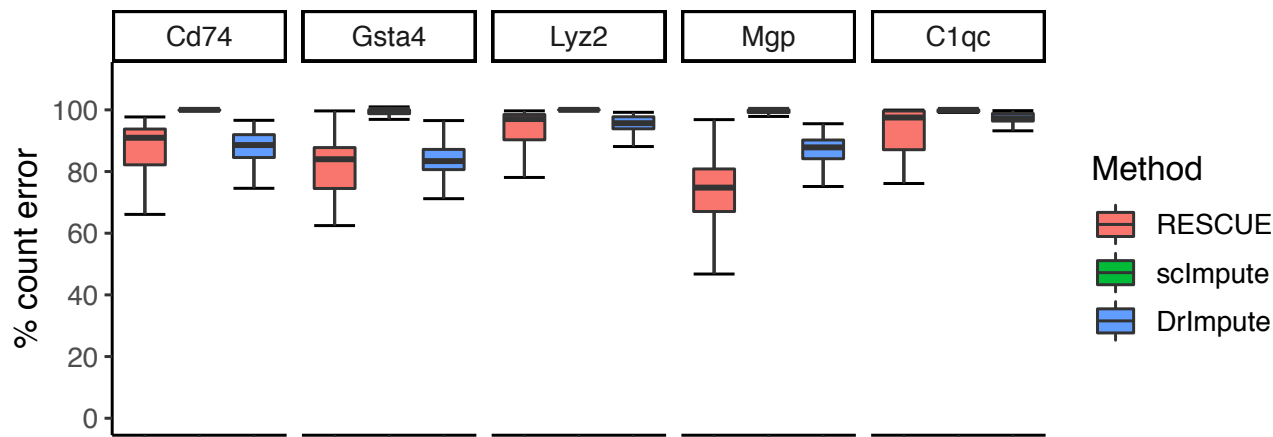**c**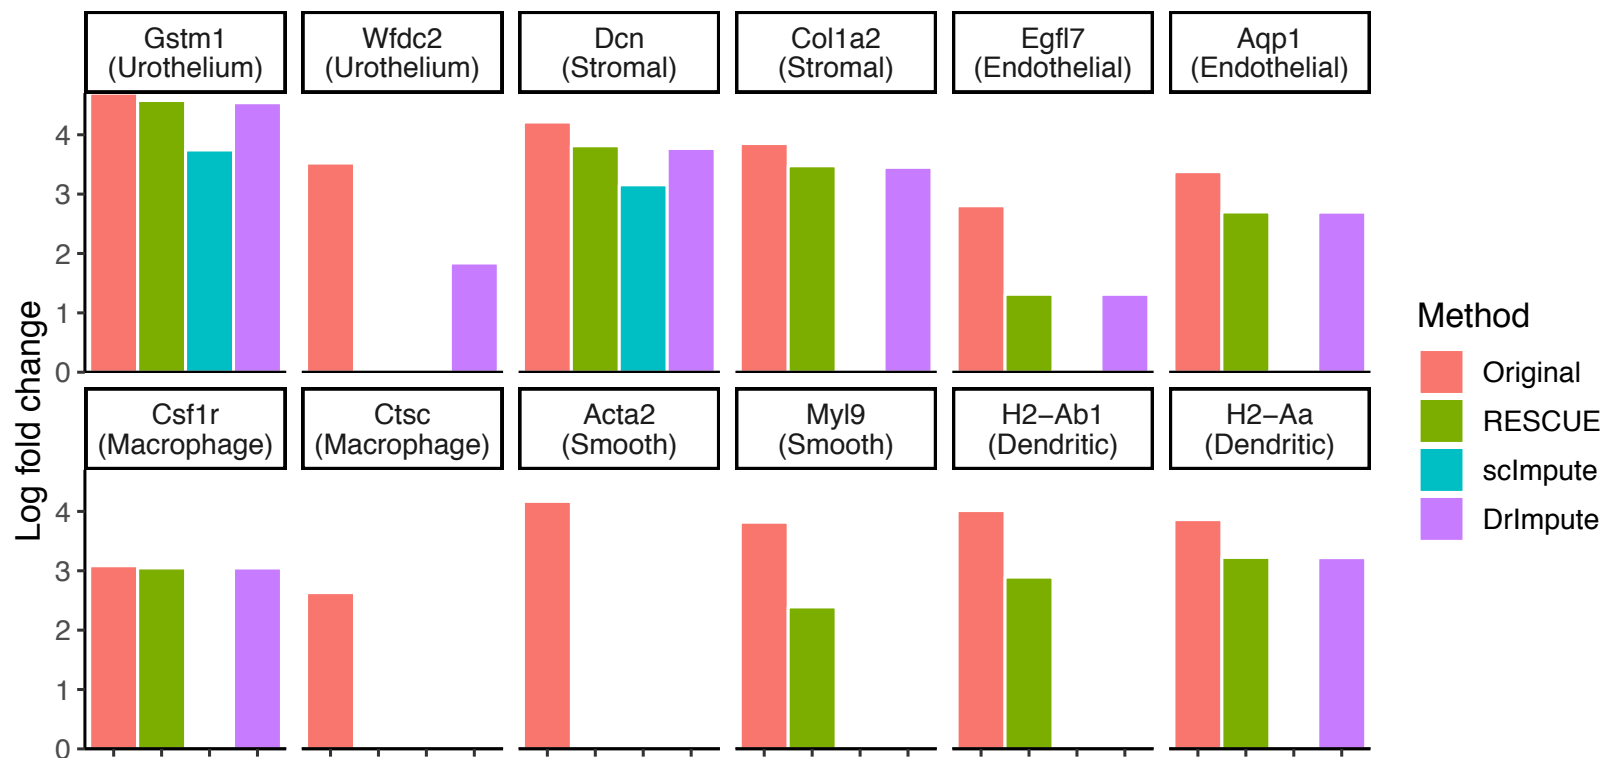

Supplement: 12859_2019_2977_MOESM5_ESM.pdf [file 12859_2019_2977_MOESM5_ESM.pdf]
